# Supplementary material
Source: PubMed Central journal article supplement (PMC7985597)
Supplement: NIHMS1670742-supplement-Supplementary_figure_1.pdf [file NIHMS1670742-supplement-Supplementary_figure_1.pdf]

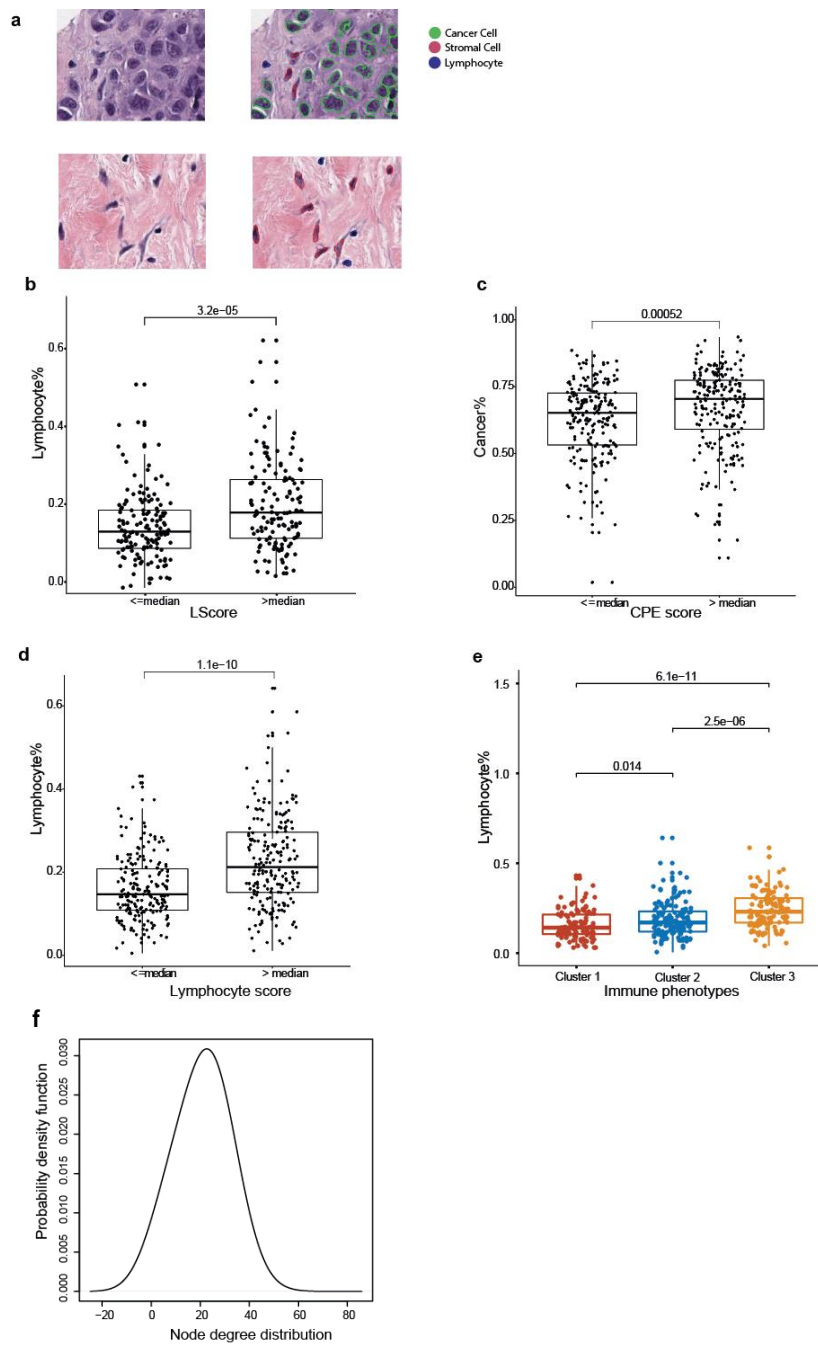

**Figure S1.** a. Example of cell classification. Left panel: original image, right panel: Classified cells. b. Correlation of LScores with lymphocyte ratios assessed by H&E classification. c. Correlation of consensus measurement of purity estimations (CPE) with cancer ratios by H&E classification. d. Correlation of lymphocyte scores assessed by Gene expression with lymphocyte ratios assessed by H&E classification e. Correlation of immune subtypes with lymphocyte ratios assessed by H&E classification<sup>15</sup> f. Node degree distribution of a Topological Tumour Graph (TTG).
