# Supplementary material
Source: PubMed Central journal article supplement (PMC7985597)
Supplement: NIHMS1670742-supplement-Supplementary_figure_2.pdf [file NIHMS1670742-supplement-Supplementary_figure_2.pdf]

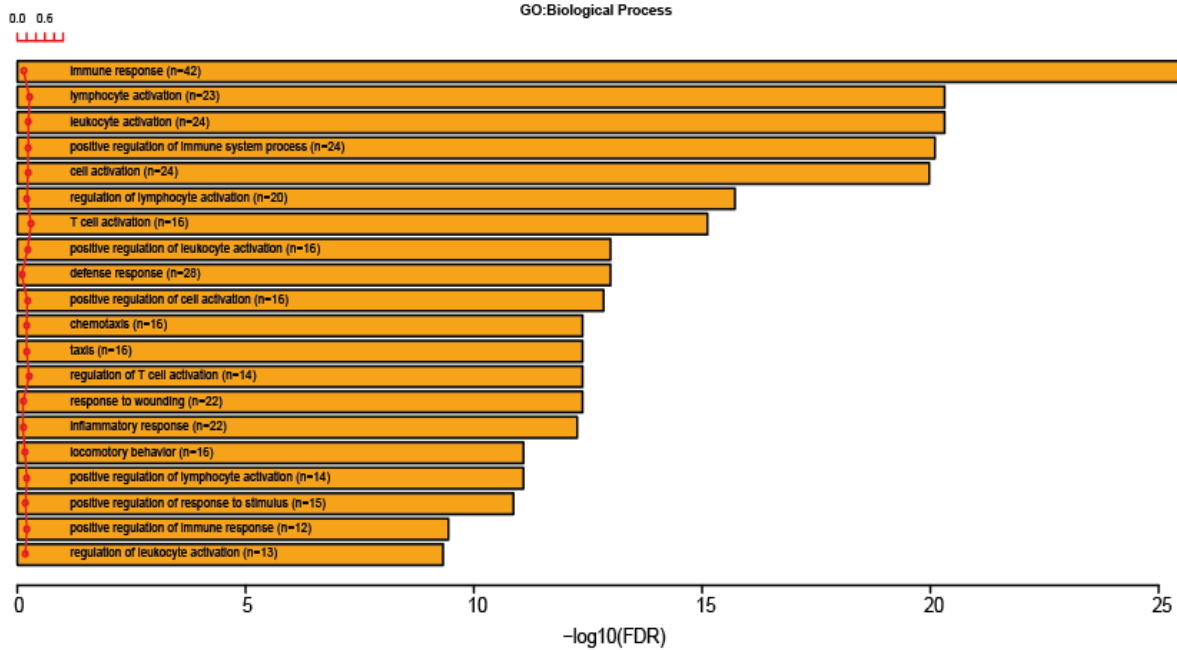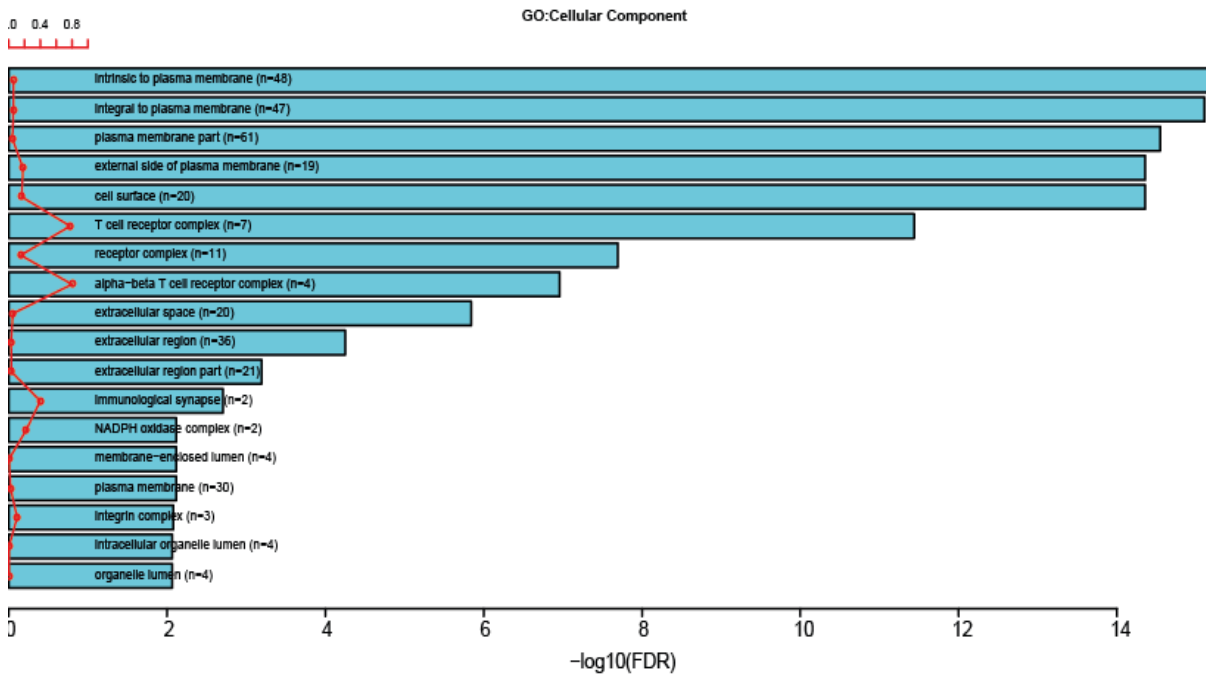

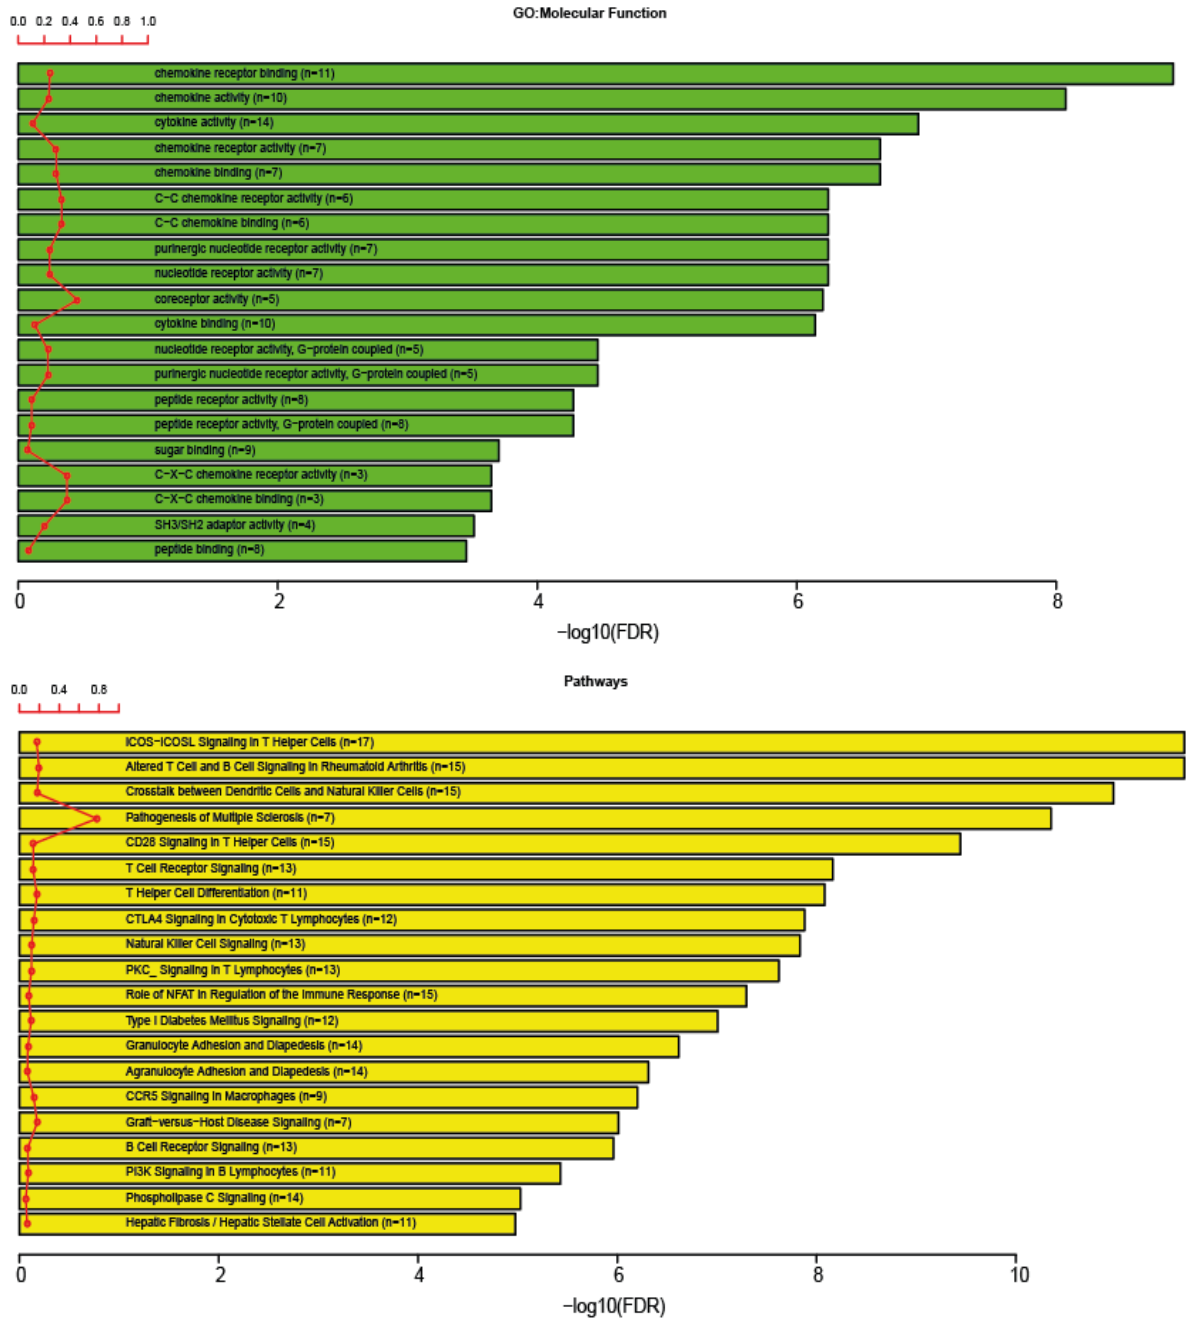

**Figure S2** Enriched GO-terms for differential expressed genes between samples with low and high lymphocyte percentage.
