# Supplementary material
Source: PubMed Central journal article supplement (PMC7985597)
Supplement: NIHMS1670742-supplement-Supplementary_figure_3.pdf [file NIHMS1670742-supplement-Supplementary_figure_3.pdf]

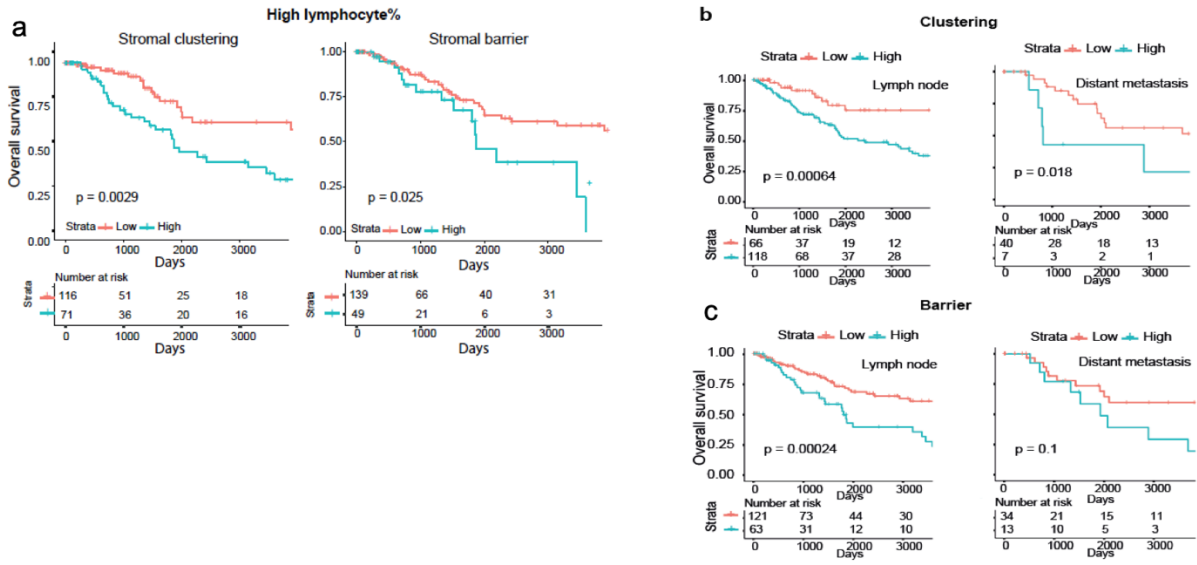

**Figure S3.** a. Kaplan-Meier curve illustrating prognostic significance of high stromal clustering and barrier in tumors with high lymphocyte%. b,c. Association of stromal clustering (b) and barrier (c) with overall survival in patients diagnosed with regional lymph node or distant metastases
