# Supplementary material
Source: PubMed Central journal article supplement (PMC7985597)
Supplement: NIHMS1670742-supplement-Supplementary_figure_4.pdf [file NIHMS1670742-supplement-Supplementary_figure_4.pdf]

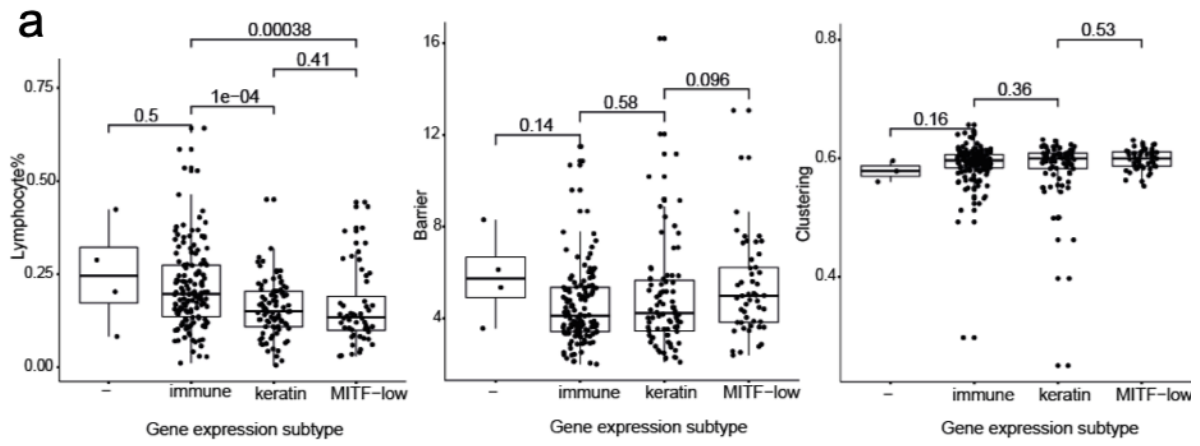

**Figure S4.** a. Correlation of Melanoma subtypes<sup>12</sup> and the ratio of lymphocytes. Middle panel: Correlation of Melanoma subtypes and the stromal barrier. Right panel: Correlation of Melanoma subtypes and stromal clustering.
