# Supplementary material
Source: PubMed Central journal article supplement (PMC7985597)
Supplement: NIHMS1670742-supplement-Supplementary_figure_5.pdf [file NIHMS1670742-supplement-Supplementary_figure_5.pdf]

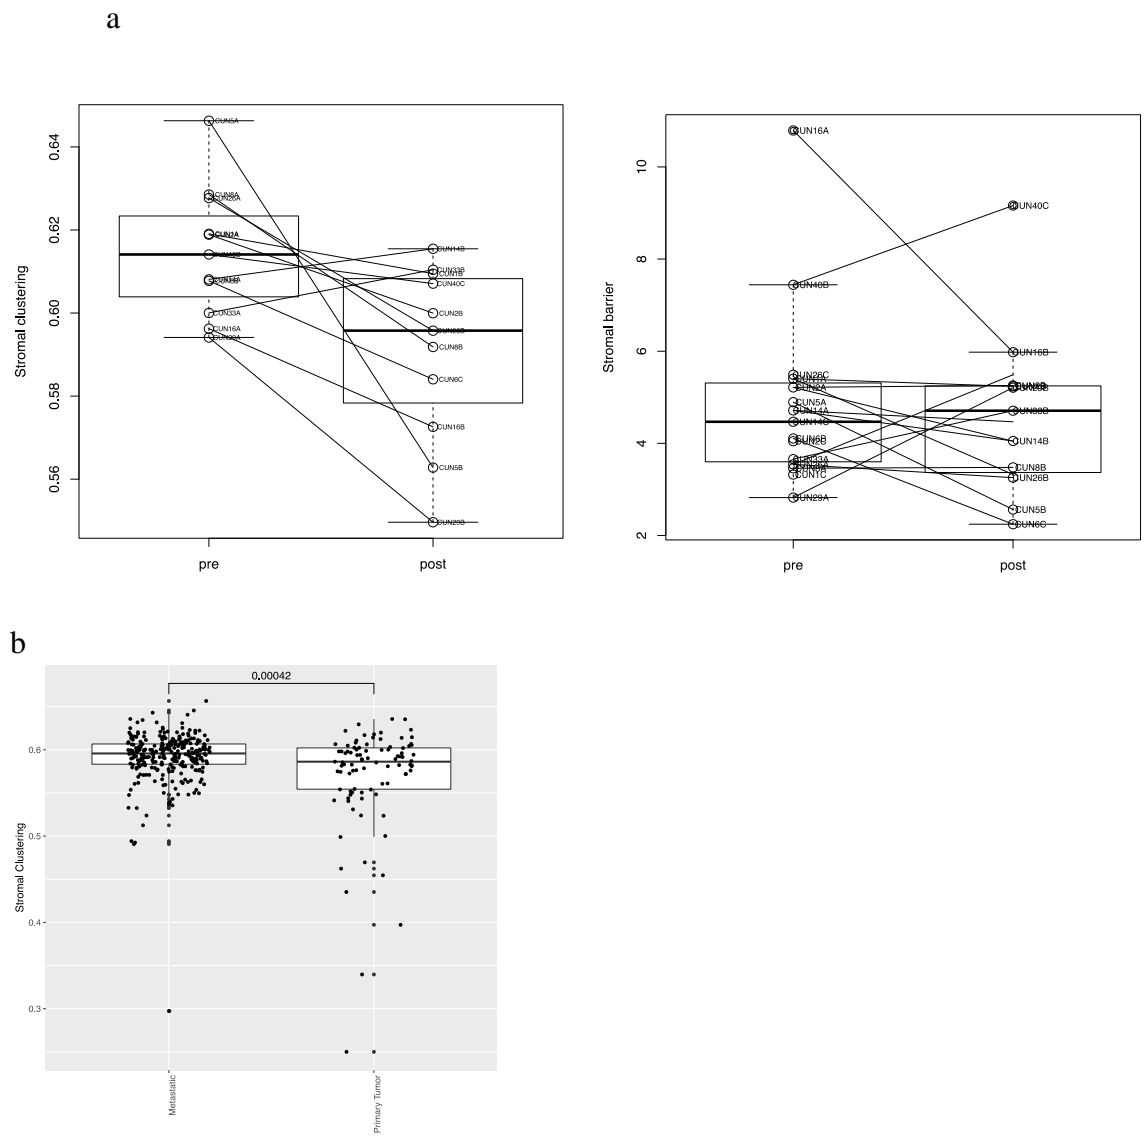

**Figure S5** .a. Boxplots illustrating the difference in stromal clustering and stromal barrier in sequential samples of the same patients. b. Boxplots showing the difference in stromal clustering in TCGA primary and metastasis samples.
